# Supplementary material
Source: Springer Nature journal article supplement (https://www.springerprofessional.de/resource/supplementary/40327_2013_5_MOESM5_ESM.pdf/10801436)

1 User takes a photo

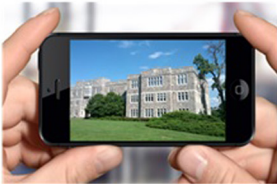

2 Camera pose recovery

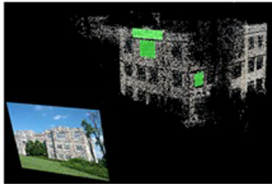

3 Overlay cyber objects

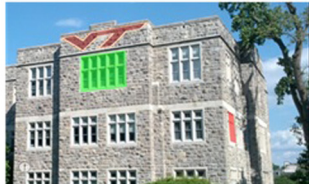

Supplement: MOESM5 [file 10801436]
